# Supplementary material
Source: publisher figshare collection journal article supplement (https://rs.figshare.com/ndownloader/files/17427359)
Supplement: Supplementary file 1 [file 17427359]

Supplementary Material Fig. S1: Associations of *M. polaris* with microspheres over the full 5 day incubation period of experiment 1.

Fig. S1: Co-associations of *M. polaris* with microspheres over the full 5 day incubation period of experiment 1. Shown are percentages of *M.* *polaris* cells co-associated with fluorescent microspheres (A), *M. polaris* abundance (B), and abundance of microspheres (C). Experimental treatments performed in triplicate include exponential growth under a light-dark cycle or shift into darkness. Error bars indicate standard deviation.
